# Supplementary material
Source: MDPI journal article supplement (https://www.mdpi.com/2079-8954/9/3/52)
Supplement: s1 [file s1]

S3 Details of the reinforcing and balancing loops (publicly accessible link: <https://kumu.io/esr/final-sdh-of-covid-19-journal-diagram-version-4>)

Figure S1a. Reinforcing loops 1- Colonization and socio-economic influence loop

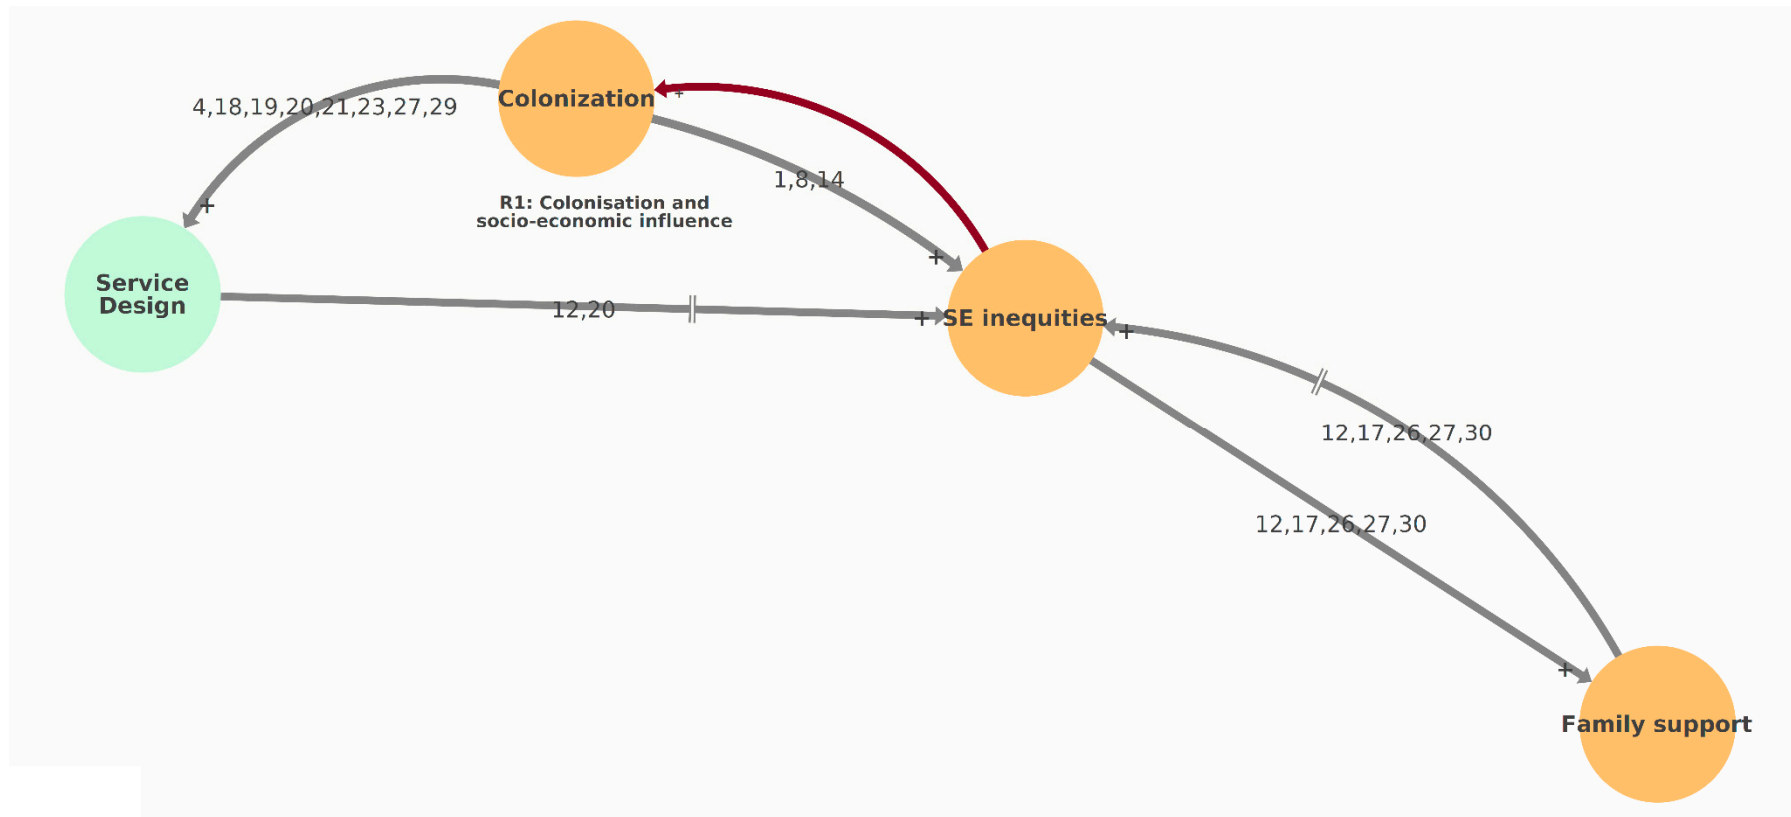

Figure S1b. Reinforcing loop 2- Pre-existing health inequity

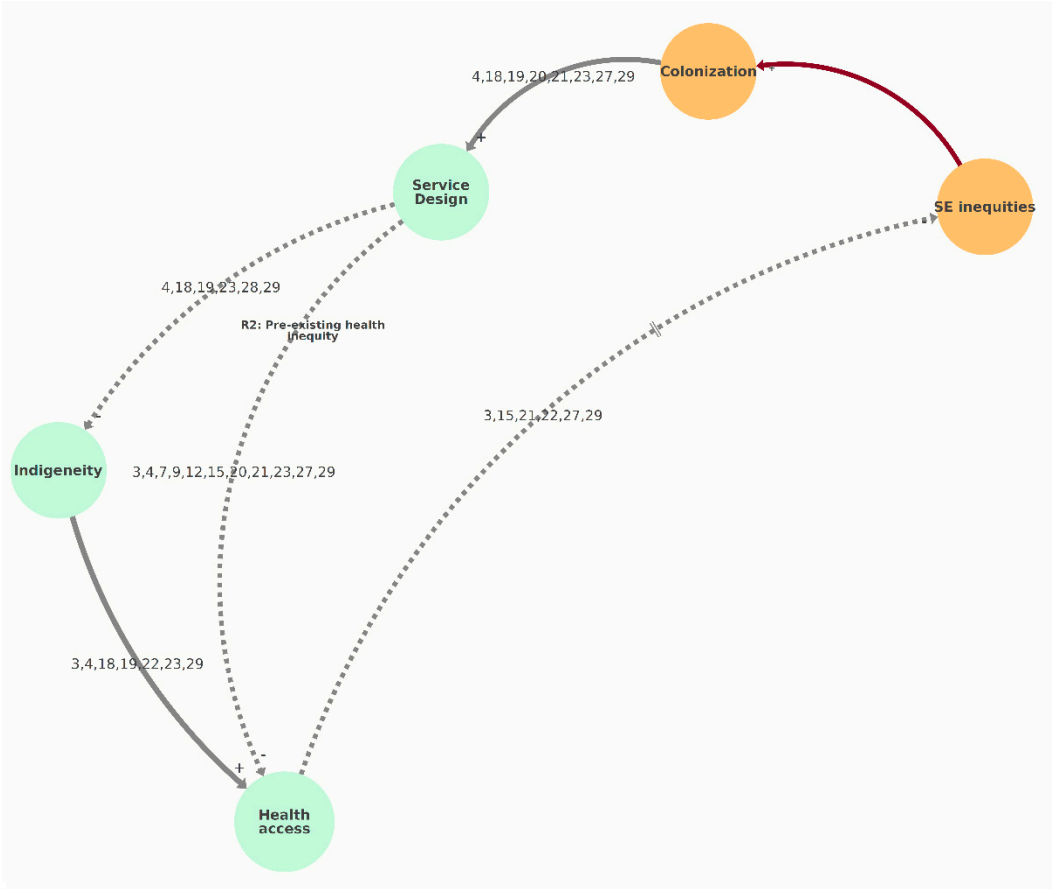

Figure S1c. Reinforcing loops 3- COVID-19 induced inequity

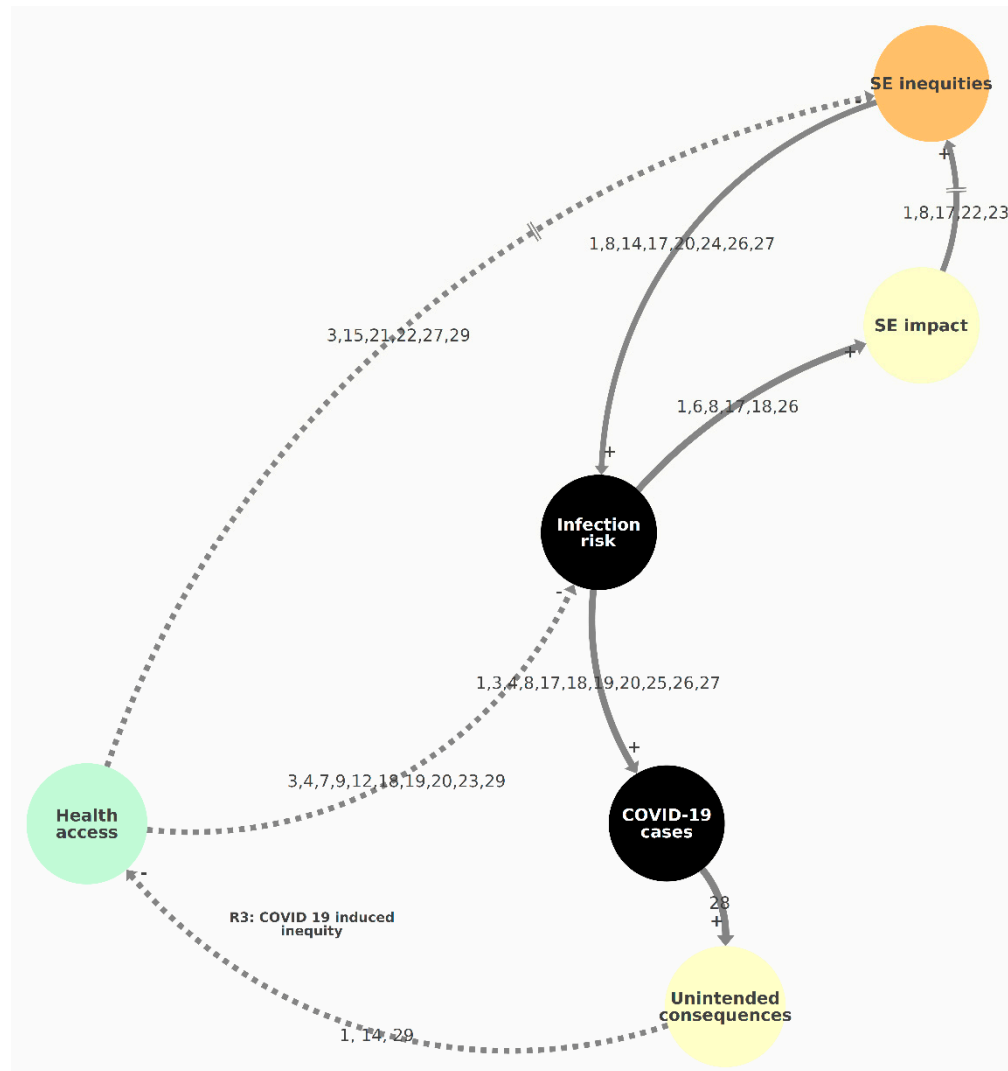

Figure S1d. Balancing loops 1- Elimination Strategy (NZ)

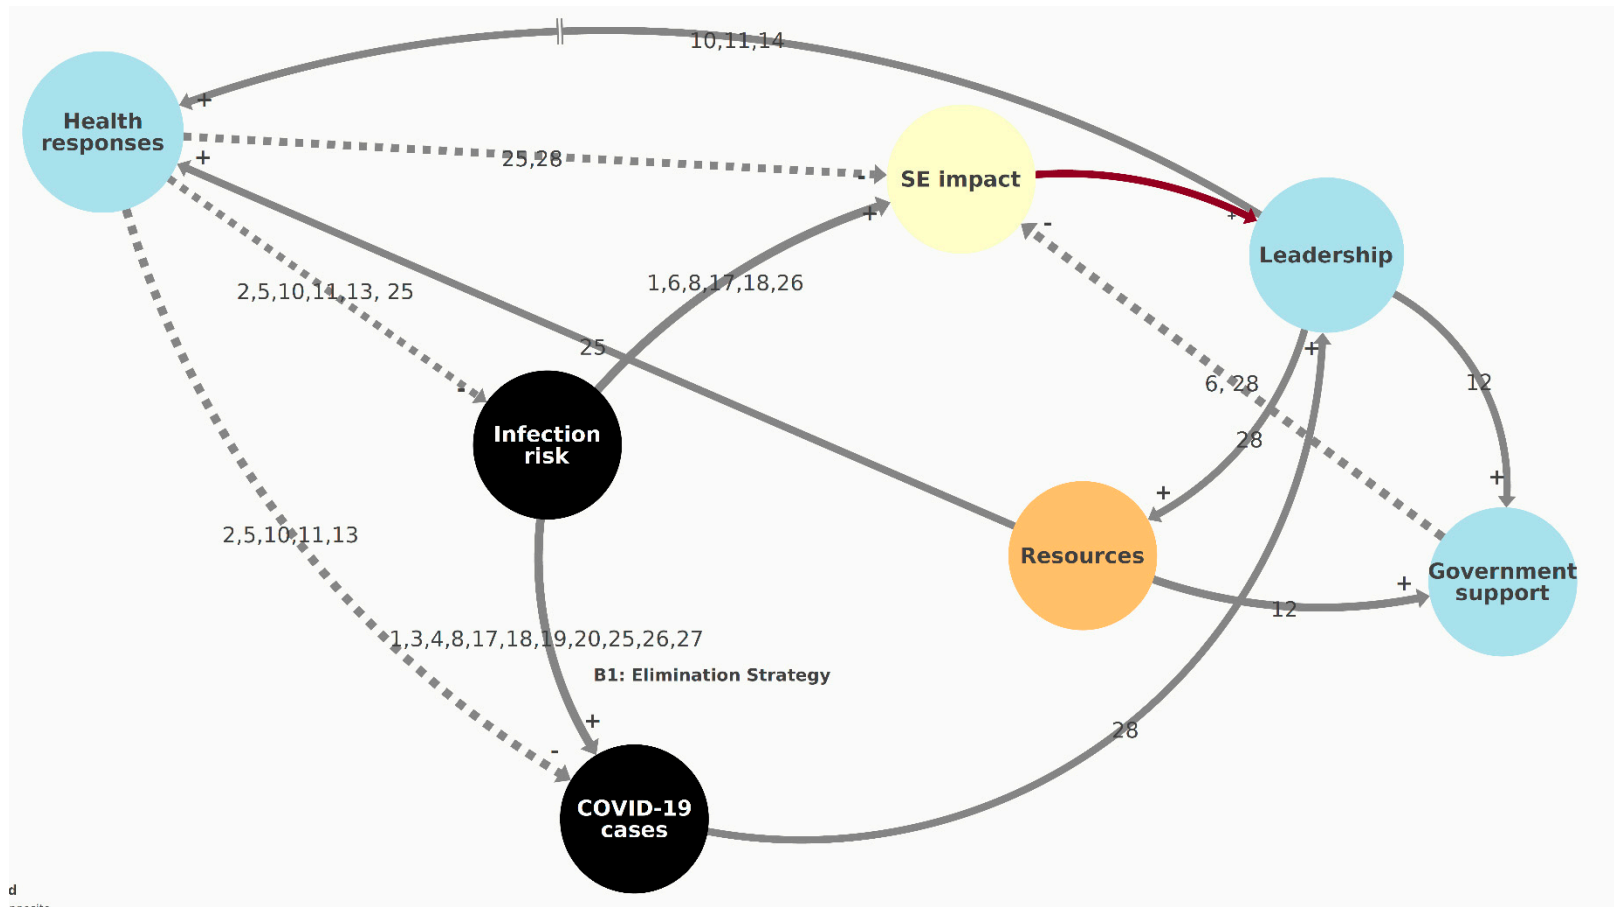

Figure S1e. Balancing loop 2-  
19 Innovation

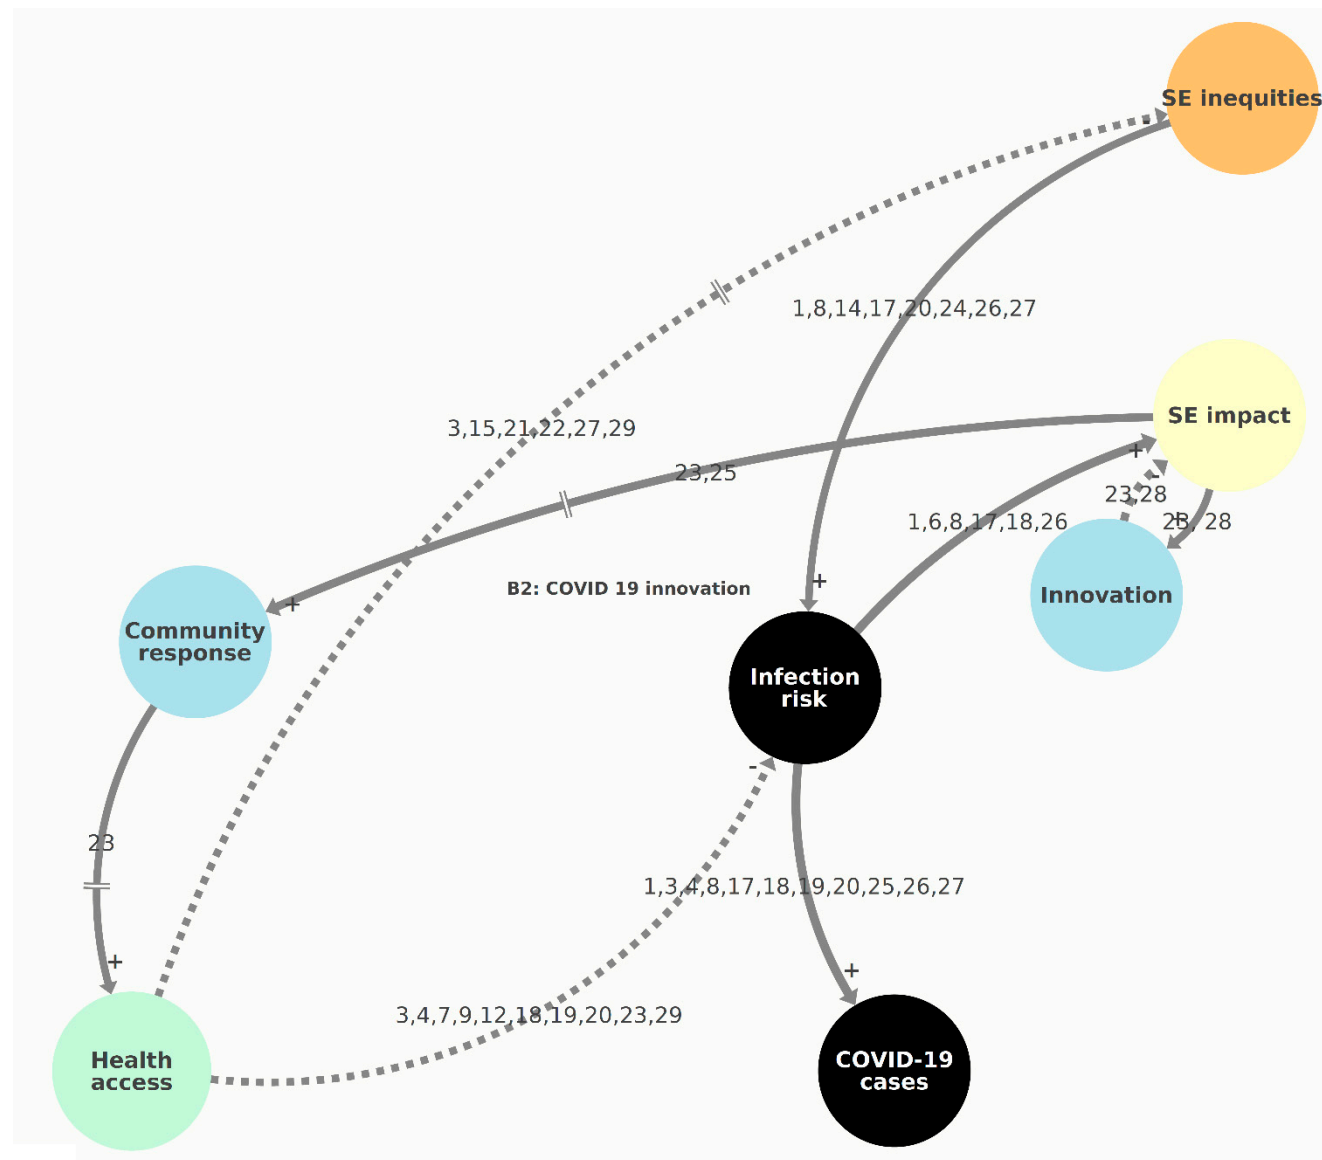

COVID-

The diagram illustrates a complex system of causal relationships between various factors, organized into three main clusters: Social/Political (orange), Health/Infection (light blue), and Economic/Policy (yellow). The nodes are represented by colored circles, and the relationships are shown by directed arrows, some solid and some dashed, with associated numerical values and signs (+/-) indicating the nature of the influence.

**Nodes and their colors:**

- Indigeneity** (Light Green)
- Health access** (Light Green)
- Health responses** (Light Blue)
- Infection risk** (Black)
- SE inequities** (Orange)
- SE impact** (Yellow)
- Leadership** (Light Blue)
- Resources** (Orange)
- Unintended benefits** (Yellow)
- Unintended consequences** (Yellow)
- Capitalism** (Orange)
- Political shift** (Orange)

**Key Relationships and Feedback Loops:**

- Indigeneity** has a positive influence (+) on **Health access** (3, 4, 18, 19, 22, 23, 29).
- Health access** has a positive influence (+) on **Health responses** (3, 4, 7, 9, 12, 18, 19, 20, 23, 29).
- Health responses** has a positive influence (+) on **Infection risk** (3, 15, 21, 22, 27, 29).
- Infection risk** has a positive influence (+) on **SE inequities** (1, 8, 14, 17, 20, 24, 26, 27).
- SE inequities** has a positive influence (+) on **SE impact** (10, 11, 14).
- SE impact** has a positive influence (+) on **Leadership** (1, 6, 8, 17, 18, 26).
- Leadership** has a positive influence (+) on **Resources** (28).
- Resources** has a positive influence (+) on **Unintended benefits** (5, 16, 28).
- Unintended benefits** has a positive influence (+) on **Unintended consequences** (3, 4, 7, 9, 12, 18, 19, 20, 23, 29).
- Unintended consequences** has a positive influence (+) on **Capitalism** (1, 14, 29).
- Capitalism** has a positive influence (+) on **Political shift** (B3: Policy reset opportunity).
- Political shift** has a positive influence (+) on **Indigeneity** (via a long feedback loop).
- Political shift** has a positive influence (+) on **Leadership** (via a long feedback loop).
- Leadership** has a positive influence (+) on **SE impact** (via a long feedback loop).
- SE impact** has a positive influence (+) on **Resources** (via a long feedback loop).
- Resources** has a positive influence (+) on **Unintended benefits** (via a long feedback loop).
- Unintended benefits** has a positive influence (+) on **Infection risk** (1, 6, 8, 17, 18, 26).
- Infection risk** has a positive influence (+) on **Health responses** (1, 8, 14, 17, 20, 24, 26, 27).
- Health responses** has a positive influence (+) on **Health access** (3, 4, 7, 9, 12, 18, 19, 20, 23, 29).
- Health access** has a positive influence (+) on **Indigeneity** (3, 4, 18, 19, 22, 23, 29).

**Feedback Loops:**

- Loop 1:** Indigeneity → Health access → Health responses → Infection risk → SE inequities → SE impact → Leadership → Resources → Unintended benefits → Unintended consequences → Capitalism → Political shift → Indigeneity. This is a long, complex feedback loop.
- Loop 2:** Health responses → Infection risk → SE inequities → SE impact → Leadership → Resources → Unintended benefits → Unintended consequences → Capitalism → Political shift → Indigeneity → Health access → Health responses. This is another long, complex feedback loop.
- Loop 3:** Infection risk → SE inequities → SE impact → Leadership → Resources → Unintended benefits → Unintended consequences → Capitalism → Political shift → Indigeneity → Health access → Health responses → Infection risk. This is a third long, complex feedback loop.
