# Supplementary material
Source: MDPI journal article supplement (https://www.mdpi.com/2079-8954/9/3/52)

## S1 Study selection flowchart

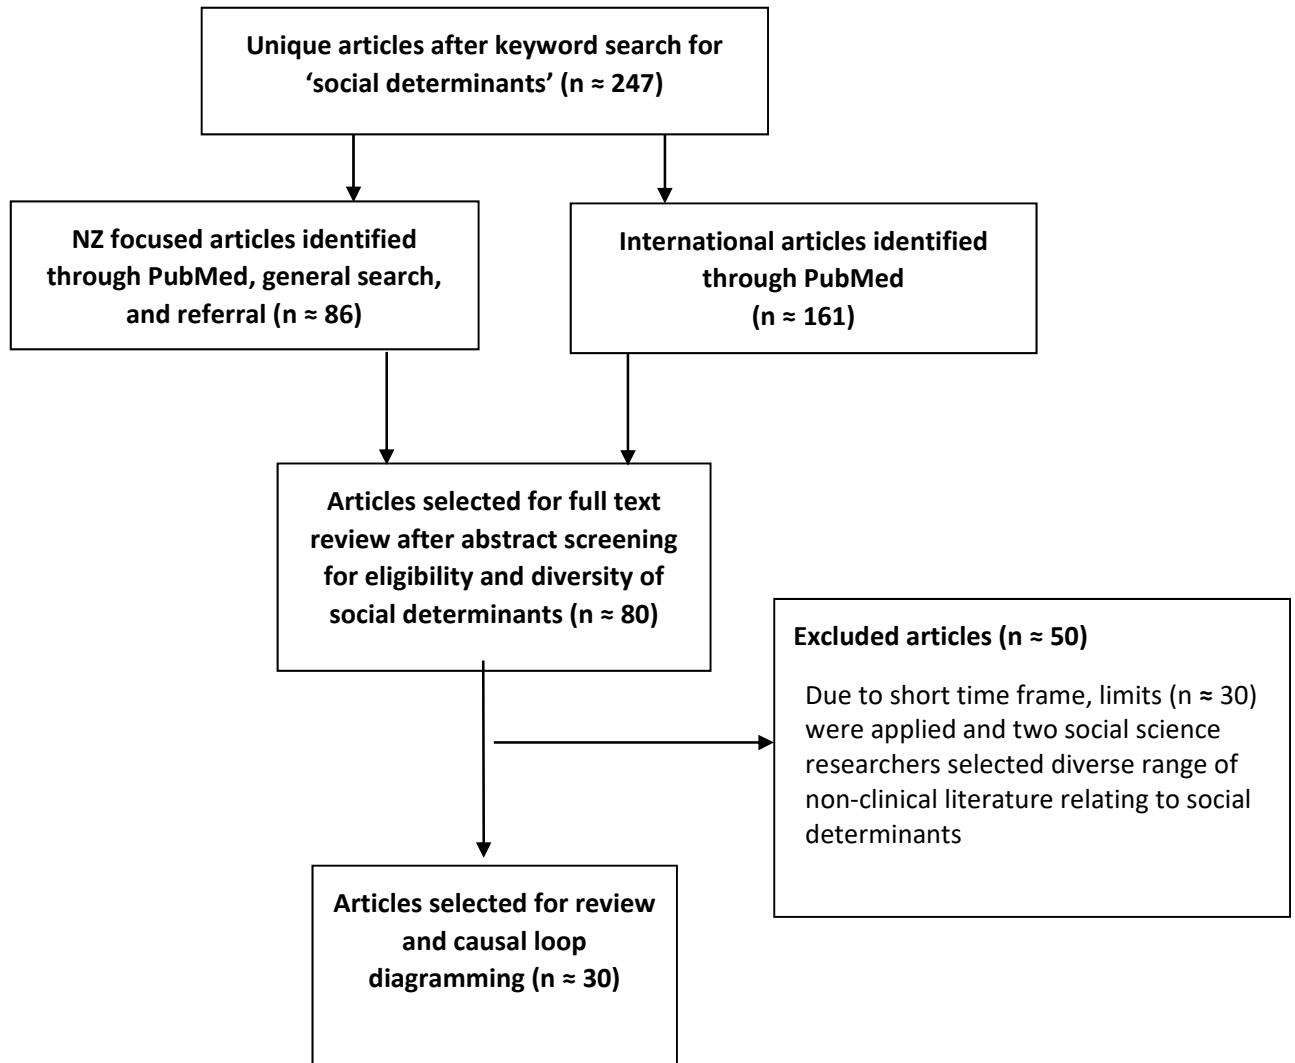

Supplement: s1 [file s1]
